# Supplementary material
Source: PubMed Central journal article supplement (PMC2657754)
Supplement: rsbl20080520s04.pdf [file rsbl20080520s04.pdf]

Table S1. Species included in analyses of continental carnivore guilds. Extant species is based on Nowak (1999) and extinct species on Martin & Klein 1989, Turner (1997), Koch & Barnosky (2006), and Prevosti & Vazcaino (2006).

| Scientific name             | Common name         | Functional group* | IUCN category**        | Threat category |
|-----------------------------|---------------------|-------------------|------------------------|-----------------|
| <b>AFRICA</b>               |                     |                   |                        |                 |
| <b>Canidae</b>              |                     |                   |                        |                 |
| <i>Lyacon pictus</i>        | Wild dog            | BCu               | Endangered             | Threatened      |
| <i>Canis simensis</i>       | Ethiopian wolf      | P                 | Critically endangered  | Threatened      |
| <i>Canis adustus</i>        | Side-striped jackal | P                 | Least concern          | Not threatened  |
| <i>Canis mesomelas</i>      | Black backed jackal | P                 | Least concern          | Not threatened  |
| <i>Canis aureus</i>         | Golden jackal       | P                 | Least concern          | Not threatened  |
| <b>Mustelidae</b>           |                     |                   |                        |                 |
| <i>Mellivora capensis</i>   | Honey badger        | SO                | Least concern          | Not threatened  |
| <b>Ursidae</b>              |                     |                   |                        |                 |
| <i>Ursus ursus</i>          | Brown bear          | SO                | Extinct                | Extinct         |
| <b>Felidae</b>              |                     |                   |                        |                 |
| <i>Homotherium latidens</i> | Scimitar cat        | AS                | Extinct                | Extinct         |
| <i>Pantera leo</i>          | Lion                | SA                | Vulnerable             | Threatened      |
| <i>Panthera pardus</i>      | Leopard             | SA                | Least concern          | Not threatened  |
| <i>Acinonyx jubatus</i>     | Cheetah             | SA                | Vulnerable             | Threatened      |
| <i>Felis caracal</i>        | Caracal             | SA                | Least concern          | Not threatened  |
| <i>Felis serval</i>         | Serval              | SA                | Least concern          | Not threatened  |
| <b>Hyaenidae</b>            |                     |                   |                        |                 |
| <i>Crocuta crucutta</i>     | Spotted hyaena      | BCa               | Conservation dependent | Not threatened  |
| <i>Hyaena brunnea</i>       | Brown hyaena        | BCa               | Near threatened        | Not threatened  |
| <i>Hyaena hyaena</i>        | Striped hyaena      | BCa               | Near threatened        | Not threatened  |
| <i>Proteles cristatus</i>   | Aardwolf            | SO                | Least concern          | Not threatened  |
| <b>Viverridae</b>           |                     |                   |                        |                 |
| <i>Civettictis civetta</i>  | Civet               | SO                | Least concern          | Not threatened  |
| <b>EUROPE</b>               |                     |                   |                        |                 |
| <b>Canidae</b>              |                     |                   |                        |                 |
| <i>Canis lupus</i>          | Grey wolf           | BCu               | Least concern          | Not threatened  |
| <i>Canis aureus</i>         | Golden jackal       | P                 | Least concern          | Not threatened  |
| <b>Mustelidae</b>           |                     |                   |                        |                 |
| <i>Gulo gulo</i>            | Wolverine           | SO                | Vulnerable             | Threatened      |
| <i>Meles meles</i>          | Badger              | SO                | Least concern          | Not threatened  |

**Ursidae**

|                        |            |    |               |                |
|------------------------|------------|----|---------------|----------------|
| <i>Ursus spelaeus</i>  | Cave bear  | SO | Extinct       | Extinct        |
| <i>Ursus arctos</i>    | Brown bear | SO | Least concern | Not threatened |
| <i>Ursus maritimus</i> | Polar bear | SO | Vulnerable    | Threatened     |

**Felidae**

|                                 |                  |    |                       |                |
|---------------------------------|------------------|----|-----------------------|----------------|
| <i>Homotherium latidens</i>     | Scimitar cat     | AS | Extinct               | Extinct        |
| <i>Panthera spelaea</i>         | Cave lion        | SA | Extinct               | Extinct        |
| <i>Panthera gombaszoegensis</i> | European jaguar  | SA | Extinct               | Extinct        |
| <i>Acinonyx pardinensis</i>     | European cheetah | SA | Extinct               | Extinct        |
| <i>Lynx lynx</i>                | Lynx             | SA | Near threatened       | Not threatened |
| <i>Lynx pardinus</i>            | Iberian lynx     | SA | Critically endangered | Threatened     |

**Hyaenidae**

|                        |             |     |         |         |
|------------------------|-------------|-----|---------|---------|
| <i>Crocota spelaea</i> | Cave hyaena | BCa | Extinct | Extinct |
|------------------------|-------------|-----|---------|---------|

**ASIA****Canidae**

|                     |               |     |               |                |
|---------------------|---------------|-----|---------------|----------------|
| <i>Canis lupus</i>  | Grey wolf     | BCu | Least concern | Not threatened |
| <i>Cuon alpinus</i> | Dhole         | BCu | Endangered    | Threatened     |
| <i>Canis aureus</i> | Golden jackal | P   | Least concern | Not threatened |

**Mustelidae**

|                           |              |    |               |                |
|---------------------------|--------------|----|---------------|----------------|
| <i>Gulo gulo</i>          | Wolverine    | SO | Vulnerable    | Threatened     |
| <i>Meles meles</i>        | Badger       | SO | Least concern | Not threatened |
| <i>Arctonyx collaris</i>  | Hog badger   | SO | Least concern | Not threatened |
| <i>Mellivora capensis</i> | Honey badger | SO | Least concern | Not threatened |

**Ursidae**

|                               |                  |    |               |                |
|-------------------------------|------------------|----|---------------|----------------|
| <i>Ursus tibethanus</i>       | Asian black bear | SO | Vulnerable    | Threatened     |
| <i>Ursus arctos</i>           | Brown bear       | SO | Least concern | Not threatened |
| <i>Ursus maritimus</i>        | Polar bear       | SO | Vulnerable    | Threatened     |
| <i>Ursus malayanus</i>        | Sun bear         | SO | Vulnerable    | Threatened     |
| <i>Ursus ursinus</i>          | Sloth bear       | SO | Vulnerable    | Threatened     |
| <i>Ailuropoda melanoleuca</i> | Giant panda      | SO | Endangered    | Threatened     |

**Felidae**

|                             |                  |    |            |            |
|-----------------------------|------------------|----|------------|------------|
| <i>Homotherium latidens</i> | Scimitar cat     | AS | Extinct    | Extinct    |
| <i>Neofelis nebulosa</i>    | Clouded leopard  | SA | Vulnerable | Threatened |
| <i>Panthera uncia</i>       | Snow leopard     | SA | Endangered | Threatened |
| <i>Acinonyx pardinensis</i> | European cheetah | SA | Extinct    | Extinct    |
| <i>Panthera tigris</i>      | Tiger            | SA | Endangered | Threatened |
| <i>Panthera pardus</i>      | Leopard          | SA | Endangered | Threatened |

|                         |         |    |                       |                |
|-------------------------|---------|----|-----------------------|----------------|
| <i>Panthera leo</i>     | Lion    | SA | Critically endangered | Threatened     |
| <i>Acinonyx jubatus</i> | Cheetah | SA | Critically endangered | Threatened     |
| <i>Lynx lynx</i>        | Lynx    | SA | Near threatened       | Not threatened |

#### **Hyaenidae**

|                        |                |     |               |                |
|------------------------|----------------|-----|---------------|----------------|
| <i>Crocuta spelaea</i> | Cave hyaena    | BCa | Extinct       | Extinct        |
| <i>Hyaena hyaena</i>   | Striped hyaena | BCa | Least concern | Not threatened |

#### **Viverridae**

|                            |           |    |               |                |
|----------------------------|-----------|----|---------------|----------------|
| <i>Arctictis binturong</i> | Binturong | SO | Least concern | Not threatened |
|----------------------------|-----------|----|---------------|----------------|

### **NORTH AMERICA**

#### **Canidae**

|                      |           |     |                       |                |
|----------------------|-----------|-----|-----------------------|----------------|
| <i>Canis dirus</i>   | Dire wolf | BCu | Extinct               | Extinct        |
| <i>Canis lupus</i>   | Grey wolf | BCu | Least concern         | Not threatened |
| <i>Canis rufus</i>   | Red wolf  | P   | Critically endangered | Threatened     |
| <i>Canis latrans</i> | Coyote    | P   | Least concern         | Not threatened |

#### **Mustelidae**

|                  |           |    |            |            |
|------------------|-----------|----|------------|------------|
| <i>Gulo gulo</i> | Wolverine | SO | Vulnerable | Threatened |
|------------------|-----------|----|------------|------------|

#### **Ursidae**

|                              |                     |    |               |                |
|------------------------------|---------------------|----|---------------|----------------|
| <i>Ursus americanus</i>      | American black bear | SO | Least concern | Not threatened |
| <i>Ursus ursus</i>           | Brown bear          | SO | Least concern | Not threatened |
| <i>Ursus maritimus</i>       | Polar bear          | SO | Vulnerable    | Threatened     |
| <i>Arctodus simus</i>        | Short-faced bear    | SO | Extinct       | Extinct        |
| <i>Arctodus pristinus</i>    | Short-faced bear    | SO | Extinct       | Extinct        |
| <i>Tremarctos floridanus</i> | Spectacled bear     | SO | Extinct       | Extinct        |

#### **Felidae**

|                            |                          |    |                 |                |
|----------------------------|--------------------------|----|-----------------|----------------|
| <i>Smilodon fatalis</i>    | Sabre toothed cat        | AS | Extinct         | Extinct        |
| <i>Homotherium serum</i>   | American scimitar<br>cat | AS | Extinct         | Extinct        |
| <i>Miracinonyx trumani</i> | American cheetah         | SA | Extinct         | Extinct        |
| <i>Panthera athrox</i>     | American lion            | SA | Extinct         | Extinct        |
| <i>Panthera onca</i>       | Jaguar                   | SA | Near threatened | Not threatened |
| <i>Felis concolor</i>      | Cougar                   | SA | Near threatened | Not threatened |
| <i>Lynx canadensis</i>     | Lynx                     | SA | Least concern   | Not threatened |
| <i>Lynx rufus</i>          | Bobcat                   | SA | Least concern   | Not threatened |

### **SOUTH AMERICA**

#### **Canidae**

|                              |            |     |                 |                |
|------------------------------|------------|-----|-----------------|----------------|
| <i>Chrysocyon brachyurus</i> | Maned wolf | P   | Near threatened | Not threatened |
| <i>Canis dirus</i>           | Dire wolf  | BCu | Extinct         | Extinct        |

|                                 |                   |     |                 |                |
|---------------------------------|-------------------|-----|-----------------|----------------|
| <i>Canis dehringi</i>           |                   | BCu | Extinct         | Extinct        |
| <b>Ursidae</b>                  |                   |     |                 |                |
| <i>Tremarctos ornatus</i>       | Spectacled bear   | SO  | Vulnerable      | Threatened     |
| <i>Arctotherium tarijense</i>   | Short-faced bear  | SO  | Extinct         | Extinct        |
| <i>Arctotherium bonaeriense</i> | Short-faced bear  | SO  | Extinct         | Extinct        |
| <i>Arctotherium brasiliense</i> | Short-faced bear  | SO  | Extinct         | Extinct        |
| <i>Arctotherium vetustum</i>    | Short-faced bear  | SO  | Extinct         | Extinct        |
| <b>Felidae</b>                  |                   |     |                 |                |
| <i>Felis concolor</i>           | Cougar            | SA  | Near threatened | Not threatened |
| <i>Panthera onca</i>            | Jaguar            | SA  | Near threatened | Not threatened |
| <i>Smilodon fatalis</i>         | Sabre toothed cat | AS  | Extinct         | Extinct        |
| <i>Smilodon populator</i>       | Sabre toothed cat | AS  | Extinct         | Extinct        |

\*) Functional groups are defined by ecomorphs suggested by Werdelin (1996): SO - Scavenger/Omnivores, BCa – Bone cracking, BCu – Bone crushing, SA – Stalk and ambush, AS - Ambush and slash, P - Pursuit

\*\*) Conservation status according to the IUCN Red list of threatened species (IUCN 2007). When necessary, additional continental classifications were taken from published IUCN species accounts (Nowell & Jackson 1996; Mills & Hofer 1998; Servheen et al. 1998; Sillero-Zubiri et al. 2004)

\*\*\*) Species were regarded as threatened if they fell in IUCN category "vulnerable", "endangered", or "critically endangered"

### **References for Table S1**

- IUCN 2007. 2007 IUCN Red List of Threatened Species. <[www.iucnredlist.org](http://www.iucnredlist.org)>
- Koch, P. L. & Barnosky, A. D. 2006 Late quaternary extinctions: State of the debate. *Ann. Rev. Ecol. Evol. Syst.* **37**, 215-250.
- Martin, P. S. & Klein, R. G. 1984 Quaternary extinctions: A prehistoric revolution. Tucson: University of Arizona Press.
- Mills, G. & Hofer, H. 1998. Hyaenas: Status Survey and Conservation Action Plan. Gland: IUCN/SSC Hyaena Specialist Group.
- Nowell, N. & Jackson, P. 1996. Wild Cats: Status Survey and Conservation Action Plan. Gland: IUCN/SSC Cat Specialist Group.
- Nowak, R. M. 1999 *Walker's mammals of the world Volume 1*, 6<sup>th</sup> edition. Baltimore: John Hopkins University Press.
- Prevosti, F. J. & Vizcaino, S. F. 2006 Paleoeology of the large carnivore guild from the late Pleistocene of Argentina. *Act. Paleont. Polon.* **51**, 407-422.
- Servheen, C. Herrero, H. & Peyton, B. 1998. Bears: Status Survey and Conservation Action Plan. Gland: IUCN/SSC Bear and Polar Bear Specialist Groups.
- Sillero-Zubiri, C., Hoffmann, M. & Macdonald, D. W. 2004. IUCN/SSC Canid Specialist Group. Gland: Canids: Foxes, Wolves, Jackals and Dogs, Status Survey and Conservation Action Plan.
- Turner, A. 1997 *The big cats and their fossil relatives*. New York: Columbia University Press.
- Werdelin, L. 1996 Carnivoran ecomorphology: A phylogenetic perspective. In *Carnivore Behavior, Ecology and Evolution Volume 2* (ed J. L. Gittleman), pp. 582-624. Ithaca: Cornell University Press, Ithaca.
